# Supplementary material
Source: HighWire-hosted journal article supplement (https://spcare.bmj.com/content/13/e3/e1038)
Supplement: inline-supplementary-material-1 [file inline-supplementary-material-1.pdf]

## APPENDIX

**Table A1.** Relationship between the two ACP questions and the primary outcomes and outcomes related to communication and support in the CODE International Survey, *stratified by country*.**Norway:**

| Outcome/response variable*                               | Q32a:<br>Invited to conversation<br>about wishes for remaining<br>lifetime? (n = 178) |     |        |         |         | Q32b:<br>Would have wanted this<br>type of conversation?<br>(n = 77) |     |        |        |         |
|----------------------------------------------------------|---------------------------------------------------------------------------------------|-----|--------|---------|---------|----------------------------------------------------------------------|-----|--------|--------|---------|
|                                                          | No.                                                                                   | OR  | 95% CI |         | P-value | No.                                                                  | OR  | 95% CI |        | P-value |
| Q16: Participant involved in decisions about care        | 175                                                                                   | 2.4 | 1.4    | to 4.4  | 0.003   | 74                                                                   | 0.6 | 0.2    | to 1.4 | 0.25    |
| Q17: Participant involved in discussions about hydration | 158                                                                                   | 3.7 | 1.9    | to 7.6  | <0.001  | 68                                                                   | 1.6 | 0.5    | to 6.4 | 0.45    |
| Q20: Level of emotional support received                 | 174                                                                                   | 2.7 | 1.5    | to 4.8  | <0.001  | 76                                                                   | 0.2 | 0.1    | to 0.5 | 0.001   |
| Q21: Patient's spiritual needs met                       | 165                                                                                   | 2.2 | 1.2    | to 3.9  | 0.007   | 72                                                                   | 0.6 | 0.2    | to 1.5 | 0.31    |
| Q22: Participant's spiritual needs met                   | 166                                                                                   | 2.7 | 1.5    | to 4.8  | 0.001   | 73                                                                   | 0.6 | 0.2    | to 1.5 | 0.24    |
| Q23: Informed about impending death                      | 174                                                                                   | 1.1 | 0.4    | to 2.9  | 0.86    | 75                                                                   | 0.2 | 0.0    | to 1.3 | 0.16    |
| Q24: Informed about what to expect in the dying phase    | 174                                                                                   | 3.1 | 1.6    | to 5.9  | <0.001  | 75                                                                   | 0.6 | 0.2    | to 1.5 | 0.26    |
| Q30: Patient treated with dignity and respect by doctors | 167                                                                                   | 4.2 | 2.1    | to 9.0  | <0.001  | 70                                                                   | 0.1 | 0.0    | to 0.4 | 0.001   |
| Q30: Patient treated with dignity and respect by nurses  | 177                                                                                   | 1.7 | 0.8    | to 3.9  | 0.20    | 76                                                                   | 0.3 | 0.0    | to 1.0 | 0.08    |
| Q31: Participant adequately supported                    | 172                                                                                   | 4.6 | 1.3    | to 21.0 | 0.02    | 73                                                                   | 0.2 | 0.0    | to 1.2 | 0.15    |

**Argentina:**

| Outcome/response variable*                               | Q32a:<br>Invited to conversation<br>about wishes for remaining<br>lifetime? (n = 98) |     |        |         |         | Q32b:<br>Would have wanted this<br>type of conversation?<br>(n = 40) |     |        |        |         |
|----------------------------------------------------------|--------------------------------------------------------------------------------------|-----|--------|---------|---------|----------------------------------------------------------------------|-----|--------|--------|---------|
|                                                          | No.                                                                                  | OR  | 95% CI |         | P-value | No.                                                                  | OR  | 95% CI |        | P-value |
| Q16: Participant involved in decisions about care        | 98                                                                                   | 2.9 | 1.3    | to 6.2  | 0.007   | 40                                                                   | 1.5 | 0.5    | to 5.4 | 0.50    |
| Q17: Participant involved in discussions about hydration | 92                                                                                   | 2.7 | 1.2    | to 6.4  | 0.02    | 39                                                                   | 0.5 | 0.1    | to 2.1 | 0.35    |
| Q20: Level of emotional support received                 | 98                                                                                   | 3.0 | 1.4    | to 6.8  | 0.006   | 40                                                                   | 0.5 | 0.1    | to 1.6 | 0.25    |
| Q21: Patient's spiritual needs met                       | 98                                                                                   | 3.4 | 1.6    | to 7.3  | 0.002   | 40                                                                   | 0.4 | 0.1    | to 1.2 | 0.10    |
| Q22: Participant's spiritual needs met                   | 98                                                                                   | 2.9 | 1.4    | to 6.2  | 0.006   | 40                                                                   | 0.2 | 0.1    | to 0.8 | 0.03    |
| Q23: Informed about impending death                      | 98                                                                                   | 8.5 | 2.8    | to 32.0 | <0.001  | 40                                                                   | 0.6 | 0.1    | to 2.2 | 0.41    |
| Q24: Informed about what to expect in the dying phase    | 98                                                                                   | 4.7 | 2.0    | to 11.4 | <0.001  | 40                                                                   | 0.3 | 0.1    | to 1.4 | 0.13    |
| Q30: Patient treated with dignity and respect by doctors | 97                                                                                   | 1.6 | 0.7    | to 4.1  | 0.28    | 39                                                                   | 0.9 | 0.2    | to 3.5 | 0.84    |
| Q30: Patient treated with dignity and respect by nurses  | 96                                                                                   | 2.1 | 0.9    | to 4.8  | 0.08    | 39                                                                   | 0.5 | 0.1    | to 1.7 | 0.28    |
| Q31: Participant adequately supported                    | 98                                                                                   | 8.4 | 2.5    | to 38.7 | 0.002   | 40                                                                   | 0.3 | 0.0    | to 1.2 | 0.12    |

The tables show odds ratios from ordinal mixed-effects regression models. Each row shows the results for the corresponding outcome variable. For item Q32a, an OR > 1 indicates that the participants who *were invited* to an ACP conversation gave more *positive* responses on the outcome items in the questionnaire. For item Q32b, an OR < 1 indicates that of the participants who were *not invited*, those who *would have wanted* such a conversation gave more *negative* responses on the outcome items; that is, they had unmet needs.

\* See Table 1 in the main paper for a complete description.

Abbreviations: No.: number of participants; OR: odds ratio; CI: confidence interval.
